# Supplementary material for: Non-conventional pressure estimates by using transmission electron microscopy coupled with energy-dispersive spectroscopy (TEM-EDS): testing on submicrometer white mica from low-grade metapelites
Source: Copernicus journal article supplement (doi:10.5194/ejm-37-343-2025), 2025-06-17
Supplement: Supplementary file 1 [file ejm-37-343-2025-supplement.zip]

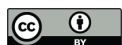

*Supplement of*

**Non-conventional pressure estimates by using transmission electron microscopy coupled with energy-dispersive spectroscopy (TEM-EDS): testing on submicrometer white mica from low-grade metapelites**

**Edoardo Sanità et al.**

*Correspondence to:* Enrico Mugnaioli ([enrico.mugnaioli@unipi.it](mailto:enrico.mugnaioli@unipi.it))

- [ejm-37-343-2025-supplement-title-page.pdf](#)
- [S1\\_material.xlsx](#)
- [S2\\_material\\_mod.docx](#)

The copyright of individual parts of the supplement might differ from the article licence.
