# Supplementary material for: Non-conventional pressure estimates by using transmission electron microscopy coupled with energy-dispersive spectroscopy (TEM-EDS): testing on submicrometer white mica from low-grade metapelites
Source: Copernicus journal article supplement (doi:10.5194/ejm-37-343-2025), 2025-06-17
Supplement: Supplementary file 1 [file ejm-37-343-2025-supplement.zip]

## Sheet: corrected_Wm_analysis
SAMPLE ULI22aT																												SAMPLE ULI8T
List of the chemical analyses used in this work. The red cells indicate analyses to which ACM has failed. The green cells indicate the ACM results on chlorite crystals.																												List of the chemical analyses used in this work. The red cells indicate analyses to which the correctio procedure (see Conconi et al., 2023 and Sanità et al., 2024c) has failed.
Raw chemical analysis of Wm grains																												Raw chemical analysis of Wm grains
	view 0 point 2	view0 point 3	view1 point 4	view2 point 5	view3 point 6	view 4 point 7	view4 point 8	view 4 point 9	view 5 point 10	view5 poimt 11	view 5 point 12	view6 point 13	view7 point 14	view8 poimt 17	view 9 point 19	view9 poimt 20	view10 poimt 21	view11 point22	view11 poimt 23	view11 point 24	view12 point 25	view12 point 26		view13 point 28	view13 point 29	view13 point 30			view0 point2	view0 point 3	view1 point 5	view2 point 6	view2 point 7	view2 point 8	view2 point 9	view3 point 10	view4 point 11	view5 point 12	view5 point 13	view6 point 14	view7 point 15	view8 point 16	view8 point 17	view9 point 20	view10 point 20	view11 point 21	view 12 point 22	view12 point 23	view12 point 24
t=0 (nm)																												t=0 (nm)
O	61.95	61.66	61.31	64.70	61.45	63.07	63.49	62.56	60.48	61.74	60.44	62.02	62.50	62.11	55.96	60.31	64.01	61.96	64.51	62.03	62.13	62.70		63.55	63.40	57.93		O	56.89	62.27	62.89	57.32	56.90	58.44	55.72	61.83	62.64	62.77	61.81	61.95	61.74	62.39	60.39	61.54	59.82	63.34	63.97	63.14	61.06
Na	0.63	0.73	0.10	0.00	0.74	1.06	0.67	2.88	0.78	0.47	0.64	0.24	0.86	0.49	0.41	0.48	1.30	0.57	0.42	0.77	0.61	0.33		0.51	3.02	2.04		Na	0.83	1.12	2.69	0.16	0.30	0.00	0.50	0.27	0.78	0.48	0.51	1.99	0.06	0.20	0.59	0.30	0.13	0.66	0.56	0.02	0.55
Mg	0.91	0.80	0.99	1.78	0.45	0.73	0.63	1.40	1.41	1.24	1.71	0.99	0.00	1.37	1.30	1.04	0.48	1.28	0.81	0.64	1.39	0.59		1.02	0.93	2.69		Mg	2.23	3.31	0.30	1.60	1.07	2.73	1.02	1.66	1.11	0.36	0.68	2.02	1.08	1.10	1.07	1.78	1.17	0.76	1.21	1.21	0.97
Al	14.61	15.11	15.22	12.10	15.47	14.51	15.08	15.08	14.82	12.06	13.75	13.85	15.09	14.06	15.79	15.14	14.00	13.62	14.17	15.97	14.66	15.33		14.34	15.11	14.71		Al	15.47	11.59	16.15	14.91	15.44	13.68	15.39	14.32	13.82	15.52	15.30	12.71	14.44	14.43	15.42	11.88	14.65	12.95	12.27	11.90	15.11
Si	17.80	17.81	17.42	16.94	17.54	17.52	16.85	15.89	19.54	19.32	20.32	18.56	18.29	18.00	21.09	18.91	17.53	18.25	16.44	17.51	16.42	17.08		16.19	15.90	18.66		Si	19.01	15.88	16.03	19.92	20.05	20.02	21.06	17.40	17.78	16.82	17.54	16.43	17.76	16.89	18.42	19.69	18.23	16.94	18.36	19.28	17.70
K	3.61	3.40	4.49	3.76	3.75	2.91	3.00	1.84	2.75	3.63	2.91	2.93	2.83	3.18	4.61	4.00	2.28	3.87	2.97	2.54	2.86	3.73		3.92	1.62	2.69		K	4.75	3.67	1.92	5.34	5.54	4.22	5.66	3.87	3.70	3.85	3.96	4.21	4.27	4.10	3.77	3.95	5.19	4.33	3.12	3.80	4.03
Ca	0.05	0.08	0.00	0.00	0.35	0.02	0.00	0.00	0.03	0.00	0.05	0.06	0.12	0.26	0.05	0.00	0.00	0.00	0.13	0.16	0.04	0.02		0.07	0.00	0.22		Ca	0.05	0.39	0.01	0.10	0.00	0.55	0.29	0.09	0.01	0.00	0.05	0.44	0.11	0.66	0.00	0.00	0.27	0.34	0.08	0.18	0.34
Ti	0.04	0.06	0.11	0.21	0.00	0.00	0.00	0.05	0.03	0.08	0.00	0.17	0.00	0.12	0.05	0.05	0.13	0.05	0.04	0.00	0.02	0.00		0.13	0.01	0.00		Ti	0.02	0.06	0.00	0.12	0.00	0.00	0.00	0.00	0.00	0.05	0.00	0.00	0.05	0.11	0.00	0.00	0.00	0.07	0.00	0.05	0.07
Cr	0.00	0.00	0.01	0.29	0.00	0.00	0.00	0.00	0.00	0.00	0.00	0.00	0.00	0.03	0.09	0.01	0.00	0.06	0.00	0.00	0.05	0.04		0.00	0.00	0.04		Cr	0.00	0.00	0.00	0.02	0.06	0.15	0.00	0.00	0.00	0.03	0.00	0.03	0.00	0.06	0.10	0.09	0.10	0.09	0.05	0.01	0.00
Mn	0.02	0.00	0.08	0.00	0.08	0.03	0.02	0.31	0.00	0.32	0.01	0.00	0.01	0.07	0.03	0.00	0.07	0.00	0.00	0.04	0.02	0.00		0.00	0.00	0.12		Mn	0.01	0.46	0.00	0.02	0.13	0.03	0.00	0.42	0.13	0.01	0.00	0.00	0.00	0.00	0.03	0.00	0.10	0.08	0.01	0.25	0.00
Fe	0.37	0.36	0.27	0.20	0.16	0.16	0.26	0.00	0.15	1.14	0.18	1.19	0.30	0.31	0.62	0.06	0.21	0.33	0.51	0.35	1.80	0.18		0.26	0.01	0.88		Fe	0.74	1.25	0.00	0.49	0.52	0.19	0.37	0.13	0.03	0.12	0.14	0.21	0.51	0.06	0.22	0.77	0.35	0.44	0.37	0.14	0.16
Total	100.00	100.00	100.00	100.00	100.00	100.00	100.00	100.00	100.00	100.00	100.00	100.00	100.00	100.00	100.00	100.00	100.00	100.00	100.00	100.00	100.00	100.00		100.00	100.00	100.00		Total	100.00	100.00	100.00	100.00	100.00	100.00	100.00	100.00	100.00	100.00	100.00	100.00	100.00	100.00	100.00	100.00	100.00	100.00	100.00	100.00	100.00
t=50 (nm)																												t=50 (nm)
O	63.61	63.31	63.11	66.29	63.18	64.59	65.00	63.87	62.10	63.41	62.09	63.63	64.07	63.76	57.95	62.08	65.43	63.64	66.00	63.56	63.63	64.34		65.18	64.66	59.55		O	58.81	63.85	64.23	59.37	58.95	60.36	57.87	63.51	64.26	64.42	63.52	63.63	63.50	64.18	62.11	63.25	61.76	65.06	65.51	64.84	62.84
Na	0.63	0.72	0.09	0.00	0.73	1.04	0.66	2.86	0.77	0.46	0.63	0.23	0.85	0.48	0.41	0.47	1.29	0.57	0.41	0.76	0.61	0.33		0.51	2.99	2.02		Na	0.81	1.11	2.67	0.15	0.29	0.00	0.49	0.27	0.77	0.47	0.50	1.96	0.06	0.20	0.58	0.29	0.13	0.65	0.55	0.02	0.55
Mg	0.88	0.77	0.96	1.73	0.44	0.71	0.61	1.36	1.37	1.20	1.66	0.96	0.00	1.33	1.25	1.00	0.46	1.24	0.78	0.62	1.35	0.57		0.98	0.90	2.61		Mg	2.16	3.21	0.30	1.55	1.03	2.63	0.98	1.60	1.08	0.34	0.66	1.95	1.04	1.06	1.03	1.72	1.12	0.73	1.17	1.17	0.93
Al	13.97	14.45	14.52	11.57	14.77	13.90	14.45	14.51	14.20	11.55	13.16	13.27	14.44	13.44	15.07	14.45	13.43	13.02	13.57	15.30	14.09	14.65		13.70	14.54	14.13		Al	14.78	11.12	15.51	14.20	14.71	13.06	14.64	13.69	13.21	14.82	14.61	12.15	13.78	13.75	14.74	11.36	13.95	12.36	11.75	11.37	14.41
Si	17.06	17.08	16.67	16.21	16.80	16.83	16.19	15.33	18.77	18.51	19.49	17.82	17.56	17.25	20.19	18.11	16.86	17.48	15.79	16.84	15.81	16.38		15.51	15.35	17.96		Si	18.21	15.23	15.47	19.02	19.16	19.13	20.09	16.68	17.04	16.12	16.80	15.71	16.99	16.13	17.66	18.85	17.40	16.18	17.60	18.42	16.94
K	3.40	3.20	4.22	3.54	3.53	2.74	2.83	1.74	2.59	3.42	2.74	2.77	2.67	3.00	4.34	3.77	2.15	3.64	2.80	2.40	2.70	3.51		3.69	1.53	2.54		K	4.47	3.46	1.82	5.01	5.20	3.97	5.31	3.64	3.48	3.62	3.73	3.96	4.01	3.85	3.55	3.72	4.86	4.07	2.94	3.57	3.79
Ca	0.04	0.07	0.00	0.00	0.33	0.02	0.00	0.00	0.03	0.00	0.04	0.05	0.11	0.24	0.04	0.00	0.00	0.00	0.12	0.15	0.04	0.02		0.07	0.00	0.21		Ca	0.05	0.37	0.01	0.09	0.00	0.51	0.27	0.09	0.01	0.00	0.05	0.41	0.10	0.62	0.00	0.00	0.26	0.32	0.08	0.17	0.32
Ti	0.04	0.06	0.11	0.20	0.00	0.00	0.00	0.04	0.03	0.08	0.00	0.16	0.00	0.11	0.04	0.05	0.12	0.05	0.03	0.00	0.02	0.00		0.12	0.01	0.00		Ti	0.02	0.06	0.00	0.11	0.00	0.00	0.00	0.00	0.00	0.04	0.00	0.00	0.05	0.10	0.00	0.00	0.00	0.06	0.00	0.05	0.07
Cr	0.00	0.00	0.01	0.27	0.00	0.00	0.00	0.00	0.00	0.00	0.00	0.00	0.00	0.03	0.08	0.01	0.00	0.06	0.00	0.00	0.05	0.04		0.00	0.00	0.04		Cr	0.00	0.00	0.00	0.02	0.06	0.14	0.00	0.00	0.00	0.03	0.00	0.03	0.00	0.05	0.09	0.09	0.09	0.08	0.05	0.01	0.00
Mn	0.02	0.00	0.07	0.00	0.08	0.03	0.02	0.29	0.00	0.30	0.01	0.00	0.01	0.07	0.03	0.00	0.06	0.00	0.00	0.04	0.02	0.00		0.00	0.00	0.12		Mn	0.01	0.43	0.00	0.02	0.12	0.03	0.00	0.39	0.12	0.01	0.00	0.00	0.00	0.00	0.03	0.00	0.10	0.08	0.01	0.24	0.00
Fe	0.35	0.33	0.25	0.19	0.15	0.15	0.25	0.00	0.14	1.07	0.17	1.12	0.28	0.29	0.58	0.06	0.20	0.31	0.48	0.32	1.69	0.17		0.25	0.01	0.83		Fe	0.69	1.17	0.00	0.46	0.48	0.17	0.34	0.12	0.02	0.11	0.13	0.19	0.47	0.05	0.21	0.72	0.33	0.41	0.34	0.13	0.15
Total	100.00	100.00	100.00	100.00	100.00	100.00	100.00	100.00	100.00	100.00	100.00	100.00	100.00	100.00	100.00	100.00	100.00	100.00	100.00	100.00	100.00	100.00		100.00	100.00	100.00		Total	100.00	100.00	100.00	100.00	100.00	100.00	100.00	100.00	100.00	100.00	100.00	100.00	100.00	100.00	100.00	100.00	100.00	100.00	100.00	100.00	100.00
t=400 (nm)																												t=400 (nm)
O	70.92	70.62	70.92	73.22	70.74	71.35	71.76	69.83	69.40	70.85	69.49	70.88	71.11	71.02	66.82	69.90	71.84	71.03	72.64	70.51	70.50	71.58		72.28	70.40	66.88		O	67.27	70.81	70.31	68.26	67.91	68.76	67.21	70.90	71.40	71.68	70.99	70.83	71.19	71.87	69.75	70.81	70.13	72.44	72.31	72.25	70.59
Na	0.62	0.72	0.09	0.00	0.72	1.04	0.66	2.86	0.76	0.47	0.62	0.24	0.85	0.48	0.40	0.46	1.29	0.56	0.42	0.76	0.62	0.33		0.51	2.99	2.00		Na	0.80	1.12	2.66	0.15	0.29	0.00	0.47	0.27	0.77	0.47	0.50	1.93	0.06	0.19	0.58	0.29	0.13	0.65	0.55	0.02	0.54
Mg	0.77	0.67	0.83	1.51	0.38	0.62	0.53	1.21	1.19	1.06	1.44	0.84	0.00	1.16	1.08	0.87	0.41	1.08	0.69	0.55	1.20	0.50		0.86	0.81	2.29		Mg	1.86	2.84	0.26	1.32	0.88	2.25	0.83	1.39	0.94	0.30	0.57	1.70	0.90	0.92	0.89	1.50	0.97	0.64	1.03	1.02	0.81
Al	11.22	11.60	11.55	9.34	11.78	11.23	11.67	11.94	11.45	9.35	10.61	10.74	11.63	10.82	11.97	11.52	10.92	10.45	10.99	12.37	11.53	11.74		10.99	11.97	11.53		Al	11.80	9.10	12.67	11.22	11.62	10.40	11.50	11.01	10.62	11.85	11.67	9.77	11.00	10.91	11.81	9.16	11.04	9.88	9.52	9.11	11.47
Si	13.72	13.77	13.32	12.96	13.48	13.64	13.15	12.66	15.19	14.83	15.70	14.39	14.21	13.87	16.11	14.49	13.72	13.99	12.80	13.73	12.94	13.19		12.44	12.70	14.63		Si	14.58	12.27	12.76	15.04	15.18	15.18	15.83	13.41	13.68	12.97	13.49	12.52	13.57	12.81	14.22	15.03	13.78	12.86	14.15	14.63	13.53
K	2.43	2.29	2.99	2.52	2.51	1.98	2.04	1.27	1.87	2.45	1.97	1.99	1.92	2.14	3.09	2.69	1.56	2.60	2.01	1.73	1.95	2.51		2.63	1.12	1.83		K	3.17	2.46	1.33	3.53	3.67	2.81	3.73	2.60	2.49	2.59	2.66	2.80	2.85	2.72	2.54	2.66	3.43	2.88	2.11	2.54	2.69
Ca	0.03	0.05	0.00	0.00	0.23	0.01	0.00	0.00	0.02	0.00	0.03	0.04	0.08	0.17	0.03	0.00	0.00	0.00	0.09	0.11	0.03	0.01		0.05	0.00	0.15		Ca	0.03	0.26	0.00	0.07	0.00	0.36	0.19	0.06	0.01	0.00	0.04	0.29	0.07	0.44	0.00	0.00	0.18	0.22	0.05	0.12	0.23
Ti	0.03	0.04	0.07	0.14	0.00	0.00	0.00	0.03	0.02	0.05	0.00	0.11	0.00	0.08	0.03	0.04	0.08	0.03	0.02	0.00	0.01	0.00		0.08	0.01	0.00		Ti	0.02	0.04	0.00	0.08	0.00	0.00	0.00	0.00	0.00	0.03	0.00	0.00	0.03	0.07	0.00	0.00	0.00	0.04	0.00	0.03	0.05
Cr	0.00	0.00	0.01	0.19	0.00	0.00	0.00	0.00	0.00	0.00	0.00	0.00	0.00	0.02	0.06	0.01	0.00	0.04	0.00	0.00	0.03	0.02		0.00	0.00	0.02		Cr	0.00	0.00	0.00	0.01	0.04	0.09	0.00	0.00	0.00	0.02	0.00	0.02	0.00	0.04	0.06	0.06	0.06	0.06	0.03	0.01	0.00
Mn	0.02	0.00	0.05	0.00	0.05	0.02	0.01	0.20	0.00	0.21	0.01	0.00	0.01	0.05	0.02	0.00	0.04	0.00	0.00	0.03	0.01	0.00		0.00	0.00	0.08		Mn	0.00	0.29	0.00	0.01	0.08	0.02	0.00	0.27	0.09	0.01	0.00	0.00	0.00	0.00	0.02	0.00	0.07	0.05	0.01	0.16	0.00
Fe	0.24	0.23	0.17	0.13	0.10	0.10	0.17	0.00	0.10	0.74	0.12	0.77	0.19	0.20	0.40	0.04	0.14	0.21	0.33	0.23	1.17	0.12		0.17	0.01	0.57		Fe	0.47	0.80	0.00	0.31	0.33	0.12	0.23	0.09	0.02	0.08	0.09	0.13	0.32	0.04	0.14	0.49	0.22	0.28	0.24	0.09	0.10
Total	100.00	100.00	100.00	100.00	100.00	100.00	100.00	100.00	100.00	100.00	100.00	100.00	100.00	100.00	100.00	100.00	100.00	100.00	100.00	100.00	100.00	100.00		100.00	100.00	100.00		Total	100.00	100.00	100.00	100.00	100.00	100.00	100.00	100.00	100.00	100.00	100.00	100.00	100.00	100.00	100.00	100.00	100.00	100.00	100.00	100.00	100.00
t estimated (nm)	53.27	64.87	62.62	-29.09	63.38	25.96	12.48	19.52	122.62	62.70	123.04	66.76	54.17	53.24	235.40	105.01	3.99	51.32	-20.90	66.19	41.59	32.29		-5.16	-3.97	179.72		t estimated (nm)	183.71	1.17	19.63	168.12	181.03	149.54	211.75	49.22	30.30	27.09	54.35	12.50	53.53	28.97	102.29	68.13	92.27	-2.94	2.19	28.11	70.83
Corrected chemical analyses after absorption correction following the procedure of Conconi et al. (2023) - H is considered, see Sanità et al. (2024)																												Corrected chemical analyses after absorption correction following the procedure of Conconi et al. (2023) - H is considered, see Sanità et al. (2024)
	view0 point 2	view 0 point3	view1 point4		view3 point6	view4 point 7	view4 point8	view4 point9	view5 point10	view5 point11	view5 point12	view6 point13	view7 point14	view8 point17	view9 point19	view9 point 20	view10 point21	view11 point22		view11 point 24	view12 point 25	view12 point26				view13 point30			view0 point2	view0 point3	view1 point5	view2 point6	view2 point7	view2 point8	view2 point9	view3 point10	view4 point11	view5 point12	view5 point13	view6 point14	view7 point15	view8 point16	view8 point17	view9 point19	view10 point20		view12 point22	view12 point23	view12 point24
	At%																												At%
O	63.71	63.76	63.52		63.60	63.88	63.88	63.09	64.13	63.80	64.15	64.13	64.19	63.86	63.51	63.78	64.13	63.68		64.02	63.39	63.78				62.94		O	62.87	62.31	63.44	63.24	63.20	63.50	63.16	63.48	63.65	63.69	63.65	62.39	63.61	63.46	63.69	63.82	63.20		64.04	64.12	63.52
Na	0.62	0.72	0.09		0.73	1.05	0.66	2.87	0.76	0.46	0.62	0.23	0.85	0.48	0.40	0.47	1.30	0.57		0.75	0.61	0.33				1.99		Na	0.79	1.12	2.68	0.15	0.29	0.00	0.47	0.27	0.77	0.48	0.50	1.98	0.06	0.20	0.58	0.29	0.13		0.56	0.02	0.54
Mg	0.88	0.77	0.95		0.43	0.72	0.62	1.38	1.32	1.19	1.59	0.95	0.00	1.33	1.14	0.97	0.48	1.24		0.62	1.36	0.58				2.45		Mg	2.00	3.31	0.30	1.44	0.95	2.47	0.89	1.60	1.09	0.35	0.66	2.00	1.04	1.08	1.00	1.70	1.09		1.20	1.19	0.92
Al	13.93	14.27	14.35		14.60	14.18	14.92	14.85	13.42	11.43	12.44	13.09	14.39	13.41	13.11	13.80	13.95	13.00		15.10	14.18	14.88				12.92		Al	13.33	11.57	15.89	12.88	13.22	12.05	12.84	13.70	13.44	15.13	14.55	12.56	13.74	14.02	14.12	11.19	13.44		12.25	11.59	14.15
Si	17.01	16.88	16.50		16.62	17.15	16.68	15.66	17.79	18.32	18.45	17.59	17.51	17.21	17.65	17.33	17.48	17.46		16.64	15.90	16.62				16.45		Si	16.49	15.87	15.80	17.31	17.29	17.67	17.69	16.69	17.32	16.43	16.74	16.24	16.94	16.44	16.96	18.56	16.79		18.33	18.78	16.65
K	3.38	3.15	4.16		3.47	2.82	2.96	1.80	2.40	3.37	2.54	2.72	2.65	2.99	3.56	3.54	2.27	3.64		2.36	2.73	3.59				2.22		K	3.86	3.67	1.88	4.38	4.49	3.54	4.43	3.65	3.56	3.72	3.71	4.15	3.99	3.95	3.34	3.64	4.62		3.11	3.67	3.69
Ca	0.04	0.07	0.00		0.32	0.02	0.00	0.00	0.02	0.00	0.04	0.05	0.11	0.24	0.04	0.00	0.00	0.00		0.15	0.04	0.02				0.18		Ca	0.04	0.39	0.01	0.08	0.00	0.46	0.23	0.09	0.01	0.00	0.05	0.43	0.10	0.64	0.00	0.00	0.24		0.08	0.18	0.31
Ti	0.04	0.06	0.10		0.00	0.00	0.00	0.04	0.03	0.08	0.00	0.15	0.00	0.11	0.03	0.05	0.13	0.05		0.00	0.02	0.00				0.00		Ti	0.02	0.06	0.00	0.10	0.00	0.00	0.00	0.00	0.00	0.05	0.00	0.00	0.05	0.11	0.00	0.00	0.00		0.00	0.05	0.06
Cr	0.00	0.00	0.01		0.00	0.00	0.00	0.00	0.00	0.00	0.00	0.00	0.00	0.03	0.07	0.01	0.00	0.06		0.00	0.05	0.04				0.03		Cr	0.00	0.00	0.00	0.01	0.05	0.12	0.00	0.00	0.00	0.03	0.00	0.03	0.00	0.06	0.08	0.08	0.09		0.05	0.01	0.00
Mn	0.02	0.00	0.07		0.08	0.03	0.02	0.30	0.00	0.30	0.01	0.00	0.01	0.07	0.02	0.00	0.07	0.00		0.04	0.02	0.00				0.10		Mn	0.01	0.46	0.00	0.01	0.11	0.03	0.00	0.39	0.13	0.01	0.00	0.00	0.00	0.00	0.02	0.00	0.09		0.01	0.24	0.00
Fe	0.34	0.33	0.24		0.14	0.15	0.26	0.00	0.13	1.05	0.15	1.09	0.28	0.29	0.47	0.05	0.21	0.31		0.32	1.70	0.17				0.71		Fe	0.59	1.25	0.00	0.40	0.41	0.15	0.28	0.12	0.03	0.12	0.13	0.20	0.47	0.05	0.20	0.70	0.31		0.37	0.14	0.15
Total	100.00	100.00	100.00		100.00	100.00	100.00	100.00	100.00	100.00	100.00	100.00	100.00	100.00	100.00	100.00	100.00	100.00		100.00	100.00	100.00				100.00		Total	100.00	100.00	100.00	100.00	100.00	100.00	100.00	100.00	100.00	100.00	100.00	100.00	100.00	100.00	100.00	100.00	100.00		100.00	100.00	100.00
a.p.f.u.																													a.p.f.u.
Na	0.12	0.14	0.02		0.14	0.20	0.12	0.55	0.14	0.09	0.12	0.04	0.16	0.09	0.08	0.09	0.24	0.11		0.14	0.12	0.06				0.38		Na	0.15	0.22	0.51	0.03	0.06	0.00	0.09	0.05	0.15	0.09	0.09	0.38	0.01	0.04	0.11	0.05	0.02		0.10	0.00	0.10
Mg	0.17	0.14	0.18		0.08	0.14	0.12	0.26	0.25	0.22	0.30	0.18	0.00	0.25	0.22	0.18	0.09	0.23		0.12	0.26	0.11				0.47		Mg	0.38	0.64	0.06	0.27	0.18	0.47	0.17	0.30	0.21	0.07	0.12	0.38	0.20	0.20	0.19	0.32	0.21		0.22	0.22	0.17
Al	2.62	2.69	2.71		2.75	2.66	2.80	2.82	2.51	2.15	2.33	2.45	2.69	2.52	2.48	2.60	2.61	2.45		2.83	2.68	2.80				2.46		Al	2.54	2.23	3.01	2.44	2.51	2.28	2.44	2.59	2.53	2.85	2.74	2.42	2.59	2.65	2.66	2.10	2.55		2.30	2.17	2.67
Si	3.20	3.18	3.12		3.14	3.22	3.13	2.98	3.33	3.45	3.45	3.29	3.27	3.23	3.33	3.26	3.27	3.29		3.12	3.01	3.13				3.14		Si	3.15	3.06	2.99	3.28	3.28	3.34	3.36	3.16	3.27	3.10	3.16	3.12	3.20	3.11	3.20	3.49	3.19		3.43	3.51	3.15
K	0.64	0.59	0.79		0.65	0.53	0.56	0.34	0.45	0.63	0.48	0.51	0.50	0.56	0.67	0.67	0.42	0.69		0.44	0.52	0.68				0.42		K	0.74	0.71	0.36	0.83	0.85	0.67	0.84	0.69	0.67	0.70	0.70	0.80	0.75	0.75	0.63	0.68	0.88		0.58	0.69	0.70
Ca	0.01	0.01	0.00		0.06	0.00	0.00	0.00	0.00	0.00	0.01	0.01	0.02	0.05	0.01	0.00	0.00	0.00		0.03	0.01	0.00				0.03		Ca	0.01	0.08	0.00	0.02	0.00	0.09	0.04	0.02	0.00	0.00	0.01	0.08	0.02	0.12	0.00	0.00	0.05		0.01	0.03	0.06
Ti	0.01	0.01	0.02		0.00	0.00	0.00	0.01	0.01	0.02	0.00	0.03	0.00	0.02	0.01	0.01	0.02	0.01		0.00	0.00	0.00				0.00		Ti	0.00	0.01	0.00	0.02	0.00	0.00	0.00	0.00	0.00	0.01	0.00	0.00	0.01	0.02	0.00	0.00	0.00		0.00	0.01	0.01
Cr	0.00	0.00	0.00		0.00	0.00	0.00	0.00	0.00	0.00	0.00	0.00	0.00	0.01	0.01	0.00	0.00	0.01		0.00	0.01	0.01				0.01		Cr	0.00	0.00	0.00	0.00	0.01	0.02	0.00	0.00	0.00	0.01	0.00	0.01	0.00	0.01	0.02	0.02	0.02		0.01	0.00	0.00
Mn	0.00	0.00	0.01		0.02	0.01	0.00	0.06	0.00	0.06	0.00	0.00	0.00	0.01	0.00	0.00	0.01	0.00		0.01	0.00	0.00				0.02		Mn	0.00	0.09	0.00	0.00	0.02	0.01	0.00	0.07	0.02	0.00	0.00	0.00	0.00	0.00	0.00	0.00	0.02		0.00	0.04	0.00
Fe	0.06	0.06	0.05		0.03	0.03	0.05	0.00	0.02	0.20	0.03	0.20	0.05	0.05	0.09	0.01	0.04	0.06		0.06	0.32	0.03				0.14		Fe	0.11	0.24	0.00	0.08	0.08	0.03	0.05	0.02	0.01	0.02	0.02	0.04	0.09	0.01	0.04	0.13	0.06		0.07	0.03	0.03
charge	-0.01	0.02	0.00		0.01	-0.01	0.00	-0.01	0.05	0.01	0.09	0.00	0.01	0.01	0.25	0.05	0.00	0.00		0.01	-0.01	0.00				0.11		charge	0.17	0.00	-0.01	0.18	0.20	0.14	0.27	0.00	-0.01	0.00	0.00	-0.01	0.01	0.00	0.05	0.00	0.06		0.00	-0.01	0.01
The analyses were corrected on the basis of 12 oxygen, following the procedure of Sanità et al. (2024)
[truncated: 61 more columns]

## Sheet: structural_formulae
Corrected chemical analysis (wt%) of Wm grains. These analysis have beeen used to perform P estimates
comment	ULI22aT											ULI14T																ULI8T															ULI3aT
Point n°	2	3	4	7	8	13	14	20	21	24	26	3	6	8	9	11	12	13	14	18	19	20	23	24	27	28	29	3	10	11	12	13	15	17	19	22	24	25	27	31	32	33	3	5	6	13	15	17	18
SiO2	51.66	51.35	49.79	52.51	50.94	53.1	53.55	52.8	53.67	50.93	50.57	53.09	54.66	52.84	52.58	53.39	54.81	53.18	52.68	53.57	54.6	51.75	52.13	52.85	56.09	51.54	55.33	46.91	50.46	52.73	49.98	50.89	51.07	51.71	56.17	55.92	50.47	53.18	52.84	56.99	52.79	50.57	49.51	50.85	52.09	49.97	51.97	50.13	52.26
TiO2	0.15	0.21	0.37	0	0	0.55	0	0.18	0.46	0	0	0.02	0.35	0.03	0	0.12	0.24	0	0.16	0.06	0.06	0.02	0	0.09	0.2	0	0.03	0.21	0	0	0.16	0	0.16	0	0	0	0.23	0	0.16	0	0.38	0	0.01	0.04	0.26	0.03	0	0	0.3
Al2O3	35.9	36.83	36.76	36.85	38.65	33.54	37.36	35.65	36.35	39.22	38.37	37.8	35.95	36.76	35.72	37.83	34.84	36.1	36.55	36.5	32.55	36.94	37.36	35.72	33.21	36.98	35.87	29.03	35.14	34.73	39.05	37.54	35.15	36.53	28.73	31.71	36.39	34.92	31.59	33.35	34.98	37.49	37.98	36.4	35.48	36.79	36.45	38.32	37.18
FeO	1.25	1.19	0.88	0.55	0.94	3.94	1.02	0.19	0.78	1.16	0.62	0.76	0.82	0.47	0.14	0.5	1.02	0.79	0.7	0.37	1.72	0.65	0	0.97	1.18	1.55	0.68	4.41	0.45	0.09	0.43	0.47	1.7	0.71	2.54	1.33	0.54	0.74	0.52	0	0.87	0.82	0.16	0.72	0.04	0.62	0.31	0.43	0.36
MnO	0.08	0	0.28	0.12	0.07	0	0.03	0	0.24	0.15	0.05	0	0.01	0.02	0.25	0.16	0.01	0.02	0.16	0	0.05	0	0	0.14	0.09	0.14	0.1	1.6	1.4	0.46	0.03	0	0	0.09	0	0.03	0	0.08	0.65	0	0	0.23	0	0.13	0	0	0.13	0	0
MgO	1.8	1.56	1.93	1.47	1.27	1.92	0.01	1.98	0.98	1.27	1.17	1.46	1.22	1.26	2.49	0.73	1.87	1.54	1.44	2	3.4	1.74	1.58	2.08	2.86	1.62	1.4	6.56	3.25	2.23	0.71	1.34	2.1	2.05	3.46	2.46	1.87	0.52	3.35	1.61	1.83	2.05	1.12	2.38	1.61	1.69	1.89	1.81	1.22
CaO	0.13	0.21	0	0.06	0	0.15	0.32	0	0	0.42	0.14	0	0	0.04	0	0	0	0.13	0	0.04	0.04	0.19	0	0.07	0	0.15	0	1.07	0.24	0.03	0	0.14	0.29	0	0	0.23	0.88	0.46	0	0.1	0.05	0	0.22	0.49	0	1.32	0.23	0	0
Na2O	0.98	1.13	0.15	1.66	1.05	0.36	1.34	0.73	2.05	1.19	0.52	0.26	0.16	0.46	0	0.3	0.32	1.69	0.4	0.06	0.71	0.3	0.36	0	0	0	0	1.71	0.42	1.22	0.75	0.79	0.09	0.91	0.46	0.87	0.85	2.56	1.92	0.95	0.56	0.35	0.76	0.68	1.75	0.45	0.24	0.38	0.71
K2O	8.05	7.51	9.84	6.77	7.08	6.43	6.36	8.46	5.46	5.65	8.55	6.61	6.83	8.12	8.82	6.97	6.88	6.55	7.91	7.4	6.87	8.41	8.57	8.08	6.37	8.02	6.59	8.5	8.64	8.51	8.88	8.83	9.44	7.99	8.64	7.44	8.77	7.54	8.97	7	8.53	8.49	10.24	8.31	8.76	9.13	8.78	8.93	7.97
Total	100	99.99	100	100	100	99.99	99.99	99.99	99.99	99.99	99.99	100	100	100	100	100	99.99	100	100	100	100	100	100	100	100	100	100	100	100	100	99.99	100	100	99.99	100	99.99	100	100	100	100	99.99	100	100	100	99.99	100	100	100	100
Si	3.21	3.18	3.12	3.23	3.14	3.3	3.28	3.26	3.28	3.12	3.14	3.24	3.33	3.25	3.25	3.26	3.35	3.27	3.25	3.28	3.36	3.2	3.21	3.26	3.42	3.19	3.36	3.06	3.16	3.27	3.1	3.16	3.2	3.2	3.5	3.45	3.15	3.3	3.32	3.47	3.27	3.14	3.1	3.16	3.24	3.13	3.22	3.11	3.22
AlIV	0.79	0.82	0.88	0.77	0.86	0.7	0.72	0.74	0.72	0.88	0.86	0.76	0.67	0.75	0.75	0.74	0.65	0.73	0.75	0.72	0.64	0.8	0.79	0.74	0.58	0.81	0.64	0.94	0.84	0.73	0.9	0.84	0.8	0.8	0.5	0.55	0.85	0.7	0.68	0.53	0.73	0.86	0.9	0.84	0.76	0.87	0.78	0.89	0.78
AlVI	1.84	1.87	1.84	1.9	1.95	1.75	1.97	1.86	1.9	1.96	1.94	1.96	1.92	1.92	1.85	1.98	1.86	1.88	1.9	1.91	1.73	1.89	1.93	1.86	1.8	1.89	1.93	1.3	1.75	1.81	1.96	1.91	1.8	1.87	1.62	1.75	1.83	1.85	1.65	1.86	1.83	1.89	1.91	1.83	1.84	1.84	1.88	1.92	1.92
Ti	0.01	0.01	0.02	0	0	0.03	0	0.01	0.02	0	0	0	0.02	0	0	0.01	0.01	0	0.01	0	0	0	0	0	0.01	0	0	0.01	0	0	0.01	0	0.01	0	0	0	0.01	0	0.01	0	0.02	0	0	0	0.01	0	0	0	0.01
FeTOT	0.06	0.06	0.05	0.03	0.05	0.2	0.05	0.01	0.04	0.06	0.03	0.04	0.04	0.02	0.01	0.03	0.05	0.04	0.04	0.02	0.09	0.03	0	0.05	0.06	0.08	0.03	0.24	0.02	0	0.02	0.02	0.09	0.04	0.13	0.07	0.03	0.04	0.03	0	0.05	0.04	0.01	0.04	0	0.03	0.02	0.02	0.02
Mn	0	0	0.01	0.01	0	0	0	0	0.01	0.01	0	0	0	0	0.01	0.01	0	0	0.01	0	0	0	0	0.01	0	0.01	0.01	0.09	0.07	0.02	0	0	0	0	0	0	0	0	0.03	0	0	0.01	0	0.01	0	0	0.01	0	0
Mg	0.17	0.14	0.18	0.13	0.12	0.18	0	0.18	0.09	0.12	0.11	0.13	0.11	0.12	0.23	0.07	0.17	0.14	0.13	0.18	0.31	0.16	0.15	0.19	0.26	0.15	0.13	0.64	0.3	0.21	0.07	0.12	0.2	0.19	0.32	0.23	0.17	0.05	0.31	0.15	0.17	0.19	0.1	0.22	0.15	0.16	0.17	0.17	0.11
Ca	0.01	0.01	0	0	0	0.01	0.02	0	0	0.03	0.01	0	0	0	0	0	0	0.01	0	0	0	0.01	0	0	0	0.01	0	0.07	0.02	0	0	0.01	0.02	0	0	0.02	0.06	0.03	0	0.01	0	0	0.01	0.03	0	0.09	0.02	0	0
Ba	0	0	0	0	0	0	0	0	0	0	0	0	0	0	0	0	0	0	0	0	0	0	0	0	0	0	0	0	0	0	0	0	0	0	0	0	0	0	0	0	0	0	0	0	0	0	0	0	0
Na	0.12	0.14	0.02	0.2	0.13	0.04	0.16	0.09	0.24	0.14	0.06	0.03	0.02	0.05	0	0.04	0.04	0.2	0.05	0.01	0.08	0.04	0.04	0	0	0	0	0.22	0.05	0.15	0.09	0.1	0.01	0.11	0.06	0.1	0.1	0.31	0.23	0.11	0.07	0.04	0.09	0.08	0.21	0.05	0.03	0.05	0.08
K	0.64	0.59	0.79	0.53	0.56	0.51	0.5	0.67	0.43	0.44	0.68	0.51	0.53	0.64	0.7	0.54	0.54	0.51	0.62	0.58	0.54	0.66	0.67	0.64	0.5	0.63	0.51	0.71	0.69	0.67	0.7	0.7	0.75	0.63	0.69	0.58	0.7	0.6	0.72	0.54	0.67	0.67	0.82	0.66	0.69	0.73	0.69	0.71	0.63
interlayer sum	0.76	0.74	0.81	0.73	0.68	0.56	0.68	0.75	0.67	0.61	0.75	0.55	0.55	0.7	0.7	0.58	0.57	0.72	0.67	0.59	0.63	0.71	0.72	0.64	0.5	0.64	0.51	1	0.76	0.82	0.79	0.8	0.79	0.74	0.74	0.7	0.86	0.93	0.95	0.66	0.75	0.71	0.93	0.77	0.91	0.87	0.74	0.75	0.71
octahedral sum	2.08	2.09	2.1	2.07	2.12	2.16	2.03	2.06	2.06	2.14	2.08	2.13	2.08	2.06	2.1	2.09	2.1	2.06	2.08	2.11	2.14	2.09	2.07	2.11	2.13	2.13	2.1	2.27	2.16	2.05	2.06	2.06	2.09	2.1	2.07	2.04	2.04	1.94	2.03	2	2.06	2.13	2.02	2.1	2	2.03	2.08	2.11	2.06
Z site	4	4	4	4	4	4	4	4	4	4	4	4	4	4	4	4	4	4	4	4	4	4	4	4	4	4	4	4	4	4	4	4	4	4	4	4	4	4	4	4	4	4	4	4	4	4	4	4	4
XMg	0.72	0.7	0.8	0.83	0.71	0.46	0.02	0.95	0.69	0.66	0.77	0.77	0.73	0.83	0.97	0.72	0.77	0.78	0.79	0.91	0.78	0.83	1	0.79	0.81	0.65	0.79	0.73	0.93	0.98	0.75	0.84	0.69	0.84	0.71	0.77	0.86	0.56	0.92	1	0.79	0.82	0.93	0.85	0.99	0.83	0.92	0.88	0.86
XNa	0.16	0.19	0.02	0.27	0.18	0.08	0.24	0.12	0.36	0.24	0.08	0.06	0.03	0.08	0	0.06	0.07	0.28	0.07	0.01	0.14	0.05	0.06	0	0	0	0	0.23	0.07	0.18	0.11	0.12	0.01	0.15	0.07	0.15	0.13	0.34	0.25	0.17	0.09	0.06	0.1	0.11	0.23	0.07	0.04	0.06	0.12
vacancy	0.24	0.26	0.19	0.27	0.32	0.44	0.32	0.25	0.33	0.39	0.26	0.45	0.45	0.3	0.3	0.42	0.43	0.28	0.33	0.41	0.37	0.29	0.28	0.36	0.5	0.36	0.49	0	0.24	0.18	0.21	0.2	0.21	0.26	0.26	0.3	0.14	0.07	0.05	0.34	0.25	0.29	0.07	0.23	0.09	0.13	0.26	0.25	0.29
AlTOT	2.63	2.69	2.72	2.67	2.81	2.46	2.69	2.6	2.62	2.83	2.81	2.72	2.58	2.67	2.6	2.72	2.51	2.61	2.65	2.63	2.36	2.69	2.71	2.6	2.38	2.7	2.57	2.23	2.59	2.54	2.86	2.75	2.6	2.66	2.11	2.3	2.68	2.55	2.34	2.39	2.56	2.74	2.81	2.67	2.6	2.71	2.66	2.8	2.7
XMs	68.01	64.51	68.99	65.73	54.83	42.06	64.22	67.59	60.49	48.27	62.66	44	47.17	61.99	58.72	49.32	48.29	66.31	57.22	48.2	49.39	61.05	62.73	52.41	37.93	51.29	42.94	58.72	58.97	67.75	74.97	73.19	68.56	62.79	42.59	50.04	74.42	80.08	64.36	52.41	64.88	56.8	85.92	66.92	75.55	75.6	65.44	61.65	63.16
XCel	0.98	4.52	4.53	2.82	13.25	8.29	2.82	2	2.82	16.13	9.7	15.33	8.32	4.55	4.53	12.14	5.34	0	6.92	10.3	0	6.1	6.14	7.62	6.9	11.48	10.35	14.59	6.13	9.95	0.82	2.83	1	5.36	24.91	15.99	7.87	7.85	27.42	13.47	3.78	10.9	4.45	2.8	14.84	8.74	2.82	10.29	5.38
XPrl	23.01	23.21	17.61	25.08	23.4	36.23	30.45	24.73	31.23	26.15	20.73	31.69	37.45	27.74	27.57	32.01	37.87	27.56	28.56	32.71	37.13	25.08	24.83	30.43	43.57	27.26	38.94	0.08	21.25	17.68	18.68	18.5	21.41	23.22	25.6	29.58	13.72	6.38	4.85	33.75	25.47	22.21	7.36	21.13	9.5	12.41	24.65	19.53	25.89
Trioct.	8	7.76	8.87	6.37	8.52	13.42	2.51	5.67	5.45	9.45	6.91	8.98	7.06	5.72	9.19	6.52	8.5	6.13	7.31	8.79	13.49	7.76	6.3	9.53	11.61	9.96	7.77	26.61	13.65	4.62	5.54	5.47	9.04	8.63	6.9	4.39	3.99	5.69	3.37	0.36	5.87	10.09	2.27	9.15	0.11	3.24	7.09	8.53	5.58
sum	100	100	100	100	100	100	100	100	100	100	100	100	100	100	100	100	100	100	100	100	100	100	100	100	100	100	100	100	100	100	100	100	100	100	100	100	100	100	100	100	100	100	100	100	100	100	100	100	100
The structural formula were ricalculated on the basis of 11 oxygens.
[truncated: 7 more columns]
